# Supplementary material for: Asparaginase-Phage P22 Nanoreactors: Toward a Biobetter Development for Acute Lymphoblastic Leukemia Treatment
Source: MDPI journal article supplement (doi:10.3390/pharmaceutics13050604), 2021-04-22
Supplement: s1 [file s1]

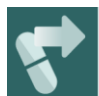

## Supplementary Material: Asparaginase-Phage P22 Nanoreactors: Toward a Biobetter Development for Acute Lymphoblastic Leukemia Treatment

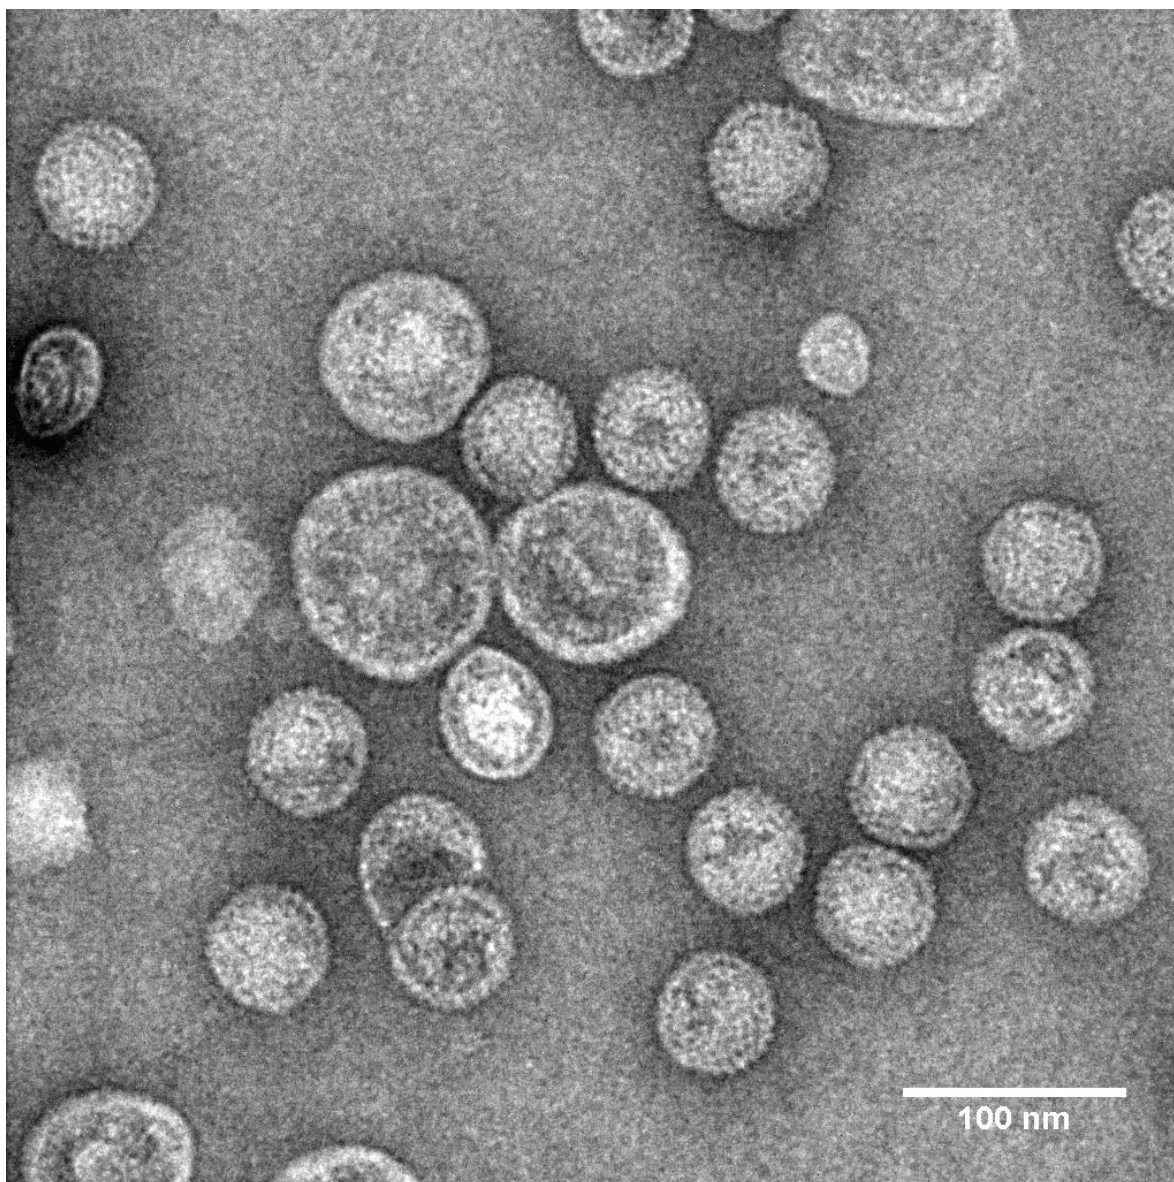

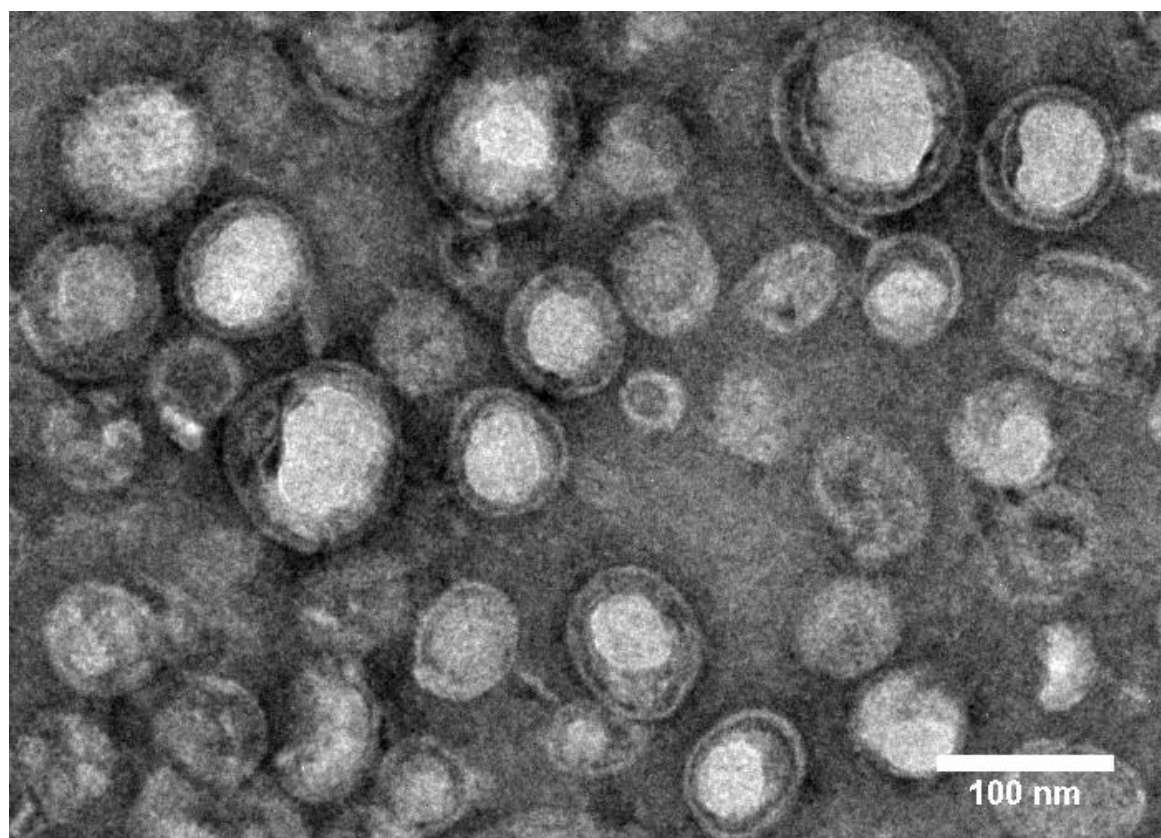

**Figure S1.** Additional TEM images of ASNase-P22 nanoreactors.

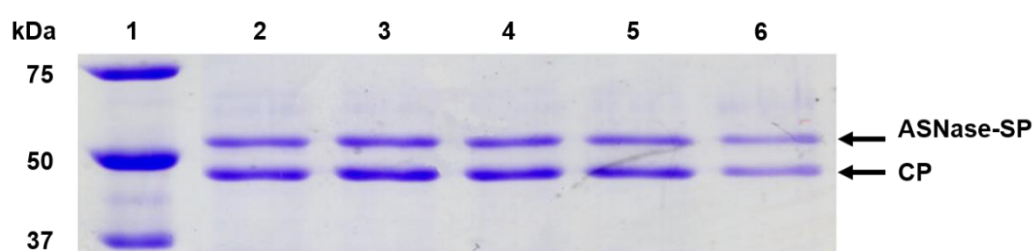

**Figure S2.** SDS-PAGE of purified samples of ASNase-P22 nanoreactors. Image used for densitometric analysis. Lane 1, molecular weight marker. Lanes 2-6 representative samples of ASNase-P22 from different chromatograms. Black arrows point out the ASNase-SP and CP bands at 53 kDa and 47 kDa, respectively.
